# Supplementary material
Source: Springer Nature journal article supplement (https://www.springermedizin.de/resource/supplementary/13027_2010_526_MOESM1_ESM.pdf/25656592)

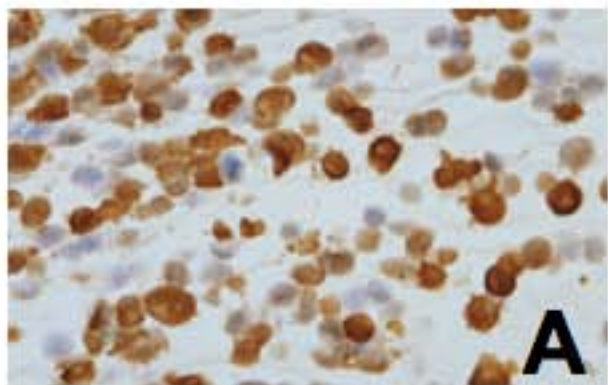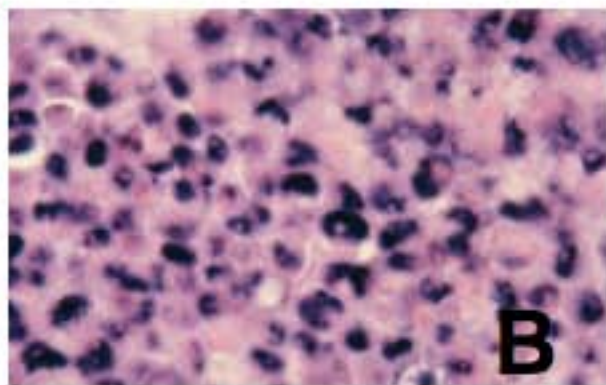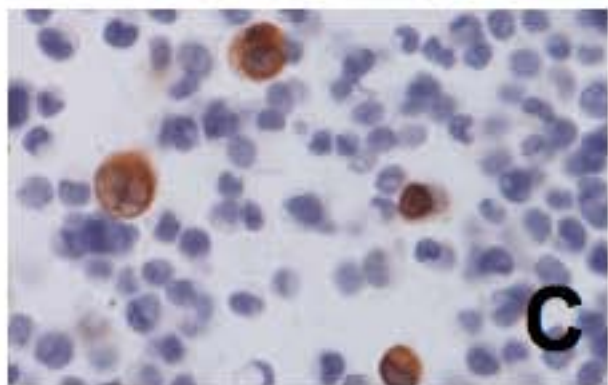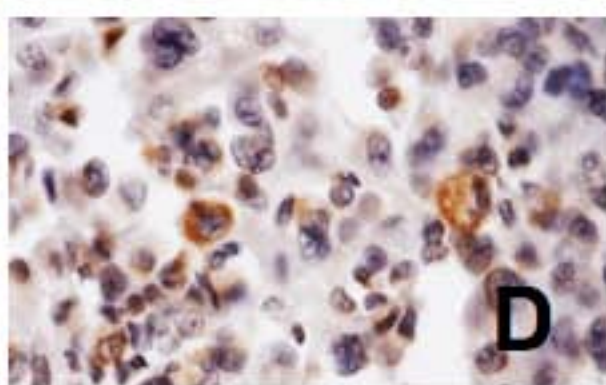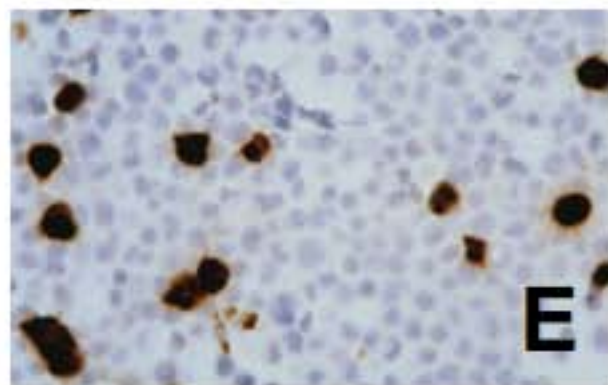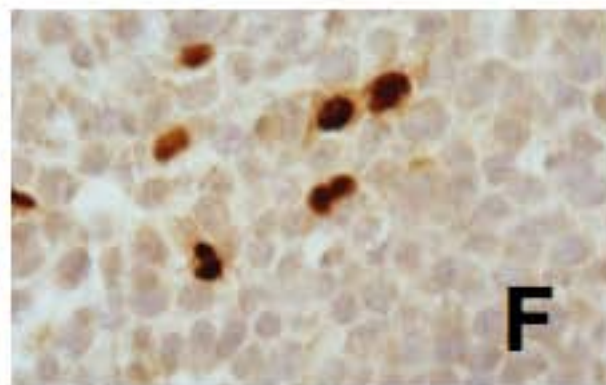

Supplement: MOESM1 [file 25656592]
